# Supplementary material for: Lipid droplet biology and evolution illuminated by the characterization of a novel perilipin in teleost fish
Source: eLife. 2017 Feb 28;6:e21771. doi: 10.7554/eLife.21771 (PMC5342826; doi:10.7554/eLife.21771)
Supplement: Figure 4—source data 1. — DOI: http://dx.doi.org/10.7554/eLife.21771.012 [file elife-21771-fig4-data1.xlsx]

## Sheet: Sheet1
	Bin Center	Basal	Forskolin/IBMX
	1	47.0135	1.38249
	2	11.1753	2.76498
	3	20.0385	11.0599
	4	12.3314	36.1751
	5	9.44123	48.6175
