# Supplementary material for: Lipid droplet biology and evolution illuminated by the characterization of a novel perilipin in teleost fish
Source: eLife. 2017 Feb 28;6:e21771. doi: 10.7554/eLife.21771 (PMC5342826; doi:10.7554/eLife.21771)
Supplement: Figure 4—source data 2. — DOI: http://dx.doi.org/10.7554/eLife.21771.013 [file elife-21771-fig4-data2.xlsx]

## Sheet: Sheet1
Bin Center	Basal	Forskolin/IBMX
1	37.5404	0
2	29.7735	0
3	20.0647	0.826446
4	12.2977	4.54545
5	0.323625	94.6281
