# Supplementary material for: Lipid droplet biology and evolution illuminated by the characterization of a novel perilipin in teleost fish
Source: eLife. 2017 Feb 28;6:e21771. doi: 10.7554/eLife.21771 (PMC5342826; doi:10.7554/eLife.21771)
Supplement: Figure 6—source data 1. — DOI: http://dx.doi.org/10.7554/eLife.21771.017 [file elife-21771-fig6-data1.xlsx]

## Sheet: Sheet1
WT				Plin6 KO
106.074	73.8555	104.712	101.621	44.1297	50.2747	54.3899	45.045
