# Supplementary material for: Lipid droplet biology and evolution illuminated by the characterization of a novel perilipin in teleost fish
Source: eLife. 2017 Feb 28;6:e21771. doi: 10.7554/eLife.21771 (PMC5342826; doi:10.7554/eLife.21771)
Supplement: Figure 6—source data 2. — DOI: http://dx.doi.org/10.7554/eLife.21771.018 [file elife-21771-fig6-data2.xlsx]

## Sheet: Sheet1
	WT	Plin6 KO
	14.4277	10.4394
	18.4351	11.2074
	14.6957	8.03924
