# Supplementary material for: Lipid droplet biology and evolution illuminated by the characterization of a novel perilipin in teleost fish
Source: eLife. 2017 Feb 28;6:e21771. doi: 10.7554/eLife.21771 (PMC5342826; doi:10.7554/eLife.21771)
Supplement: Figure 7—source data 1. — DOI: http://dx.doi.org/10.7554/eLife.21771.022 [file elife-21771-fig7-data1.xlsx]

## Sheet: Sheet1
	WT	KO
	4.70356	14.3696
	8.72742	11.4449
	7.17181	16.0952
