# Supplementary material for: Lipid droplet biology and evolution illuminated by the characterization of a novel perilipin in teleost fish
Source: eLife journal article supplement (doi:10.7554/elife.21771), 2017-02-28
Supplement: supp [file elife-21771-supp-v1.zip]

# Plin PKA Domains

|                        |                         |
|------------------------|-------------------------|
| <i>D. rerio</i>        | KAMDGRPRRRR <b>S</b> LY |
| <i>C. auratus</i>      | KAMDGRPRRRR <b>S</b> LY |
| <i>T. nigroviridis</i> | KAMDGRPRRRR <b>S</b> LH |
| <i>O. niloticus</i>    | KAMDGRPRRRR <b>S</b> LH |
| <i>L. oculatus</i>     | KASEGRLARRRRQA          |

|                        |                         |
|------------------------|-------------------------|
| <i>D. rerio</i>        | SPVPANGRKG <b>S</b> LKT |
| <i>C. auratus</i>      | TRVSANGRKG <b>S</b> LKL |
| <i>T. nigroviridis</i> | SPDPSSNRRR <b>S</b> LKE |
| <i>O. niloticus</i>    | PDPPNGRRRR <b>S</b> LKE |
| <i>L. oculatus</i>     | -----                   |

|                        |                          |
|------------------------|--------------------------|
| <i>D. rerio</i>        | IRRRR <b>S</b> TTEVLLAP  |
| <i>C. auratus</i>      | IRRRR <b>S</b> TTEVLLEP  |
| <i>T. nigroviridis</i> | SQRRP <b>S</b> AAELLTP   |
| <i>O. niloticus</i>    | APRRP <b>S</b> AAELLAP   |
| <i>L. oculatus</i>     | PRRRR <b>S</b> STEVLFLAP |
