# Supplementary material for: Lipid droplet biology and evolution illuminated by the characterization of a novel perilipin in teleost fish
Source: eLife journal article supplement (doi:10.7554/elife.21771), 2017-02-28
Supplement: supp [file elife-21771-supp-v1.zip]

Plin1\_Dr1----MASEKKDTGEVLKDQNVFFRIILNIRSVNAALESIEKTYTSTKQSHPIISSVCGLYE

Plin2\_Dr1-----MGSMEDVNNQNVVARIVHLPLVVSTYDMMSNVYVNTKNNHPYLKSVCEVAE

Plin3\_Dr1MADNVKTAEKDKEDSQEQQSVISRVGNLPLVSSACGAVYNAYSSTKDSVPLLKGVMEEVAE

Plin6\_Dr1-----MIKTRNSEGNVLNRVVKLPLVSSALQQASSVYTVVKGRYP LLG FVGGVAE

Plin1\_Dr57KGVSRAGNLAVWSMKPALHVLQPOLVAANSMAACKGLDRLEEKVPALQSPPAELAA NIKG-

Plin2\_Dr52NGVKSITSAAFHSALPIIGKLEPQISMANDLACKGLDKIEKTLPI LHKPSEQIMANAKDA

Plin3\_Dr61SGVRTLGAAASTGSKPILDRLEPQIAAVNEYATKGLEKVEGNLPILQQPADKLVSDTVG-

Plin6\_Dr51LSVRSASTAALQQAAPLLQNLQPEIEAVNTYAMVG LDQLEKYFPILQQPTDEVVANLKD-

Plin1\_Dr116-----LMSSTLEAAKDGITCPTIKHSSNVVLDKVSSRYQQSKNTLSGGIQYIILNSKLVFL

Plin2\_Dr112VTGAKEAVSGTVSGAKESVSITLNDVMDRTRGAVQGSVEKTKTVVSGGVQTVMDSRMLKL

Plin3\_Dr120-----MVYQSVTGAKDAVV-----GAVMEGVEKTRMAVTGGINTVMGSRVGQM

Plin6\_Dr110-----AFFSRLDDAQSRINDEL-----DRAVDRWDR LIDQMWRL LAEAQGS GPGR A

Plin1\_Dr170AEQRASRALSLTENLIDCILP-GTSDKTENDRSTEEQQESYVGASD-----PMPIFSR

Plin2\_Dr172VSSRVDNALSTSETLLEHYLPENEEKEGEERNTEGLENDSDLAN-----YYVR

Plin3\_Dr163VSNGVDKALTHSEDWVEQNLPISEKELATLAEPRPGEEEGFIVST-----RSSYFVR

Plin6\_Dr156ITAGLDELITQSEEAVAYYLPLPPTLRYEYERMVQSYEDEHLHND DEDDDDEEFP PMW MR

Plin1\_Dr222LGALASTICRRAFEKTF AQLQLSTHQ-----GHTLVKRIPGLNPLVEFTMSTM----RT

Plin2\_Dr221LGSLSIKVRDRTYQRAVEKVRHAVQR-----GQESISQLNHTMDIIEFTRKNI----DG

Plin3\_Dr215LGKLSAKVRERALEQSLLRARKARDT-----THASVTQMTSTMDLLESARVTL----TS

Plin6\_Dr216IRSL L ICLYFQLYR-LMKLRERVDN I LQMLGAA AETVGLKRLMEMVEMLLQ L LLSFYTA

Plin1\_Dr272MGGI I KGF PSSMATY LKDGQ QHS---PLK-----EMAND--EHGQVKS NGL--V

Plin2\_Dr271SNQKLQEKLGSLMG-WKSVSQSQ--ETE-----SETDS--EAEQIESRTL TIA

Plin3\_Dr265ANQQLAGAPEQLLQRWKEWKEGQ--PKELQEKVTAETEA DGAKD--KEQEMESKALLMV

Plin6\_Dr275RVH HVEELRSQ LVSRLTAGLQALT VWPPVQ QMLVLP TQVRALTNDLLELGQILIQ L LINT

Plin1\_Dr314SGLGQRLLKVYGSVVANIKKTSRTSFNLAKDGVNIVLGSFGTVREKTLHKL-SYYGLIPR

Plin2\_Dr314HSLSQQLQSTCVVLVSSLR-----GLPQH VQLQVGSVS-RSALEIYS

Plin3\_Dr320RGLSDQLKTACSGVVSSVQ-----GLPGTVQEQLLNAR-RTAGELQA

Plin6\_Dr335TPLYDLVKQVSD L DAANNPTPDEVPESPSGR-----ASANS L FLKAMDGRPRRRRSLYA

Plin1\_Dr373RLSKTEGGSQPAEKDGAE ECLCGFLVLESNVGNIIHSRNDNSEKQPLKVTEP-MDISEET

Plin2\_Dr355SLSKA-----AVLGDLSSTVLSSSRSQLSRITES-MD-----

Plin3\_Dr361SLSGT-----KTLTPVLL LQTRQQIGQVRQS-LD-----

Plin6\_Dr389RSRRGSSSGVPTSPVQSPTPTPSPVPANGRKGSLKTDNSVGPPELDTLAVPTTDMIRRR

Plin1\_Dr432RQLKKKLMKQIPMQ-----HRVVLGGSNKKSP TTEPVGRRV-----

Plin2\_Dr386-NVMDYLLNNTPLNWLVGPFYPRVERAVENEAKCSKQRTLQVTE----

Plin3\_Dr389-GVVEYLLNNTPLNWLVGPFAPQITEKGE-----

Plin6\_Dr449SSTTEVLLA--PIMQLV----TQSQRAFEYLS SSNEDQVLPVVETTEH
