# Supplementary figures and images for: Lipid droplet biology and evolution illuminated by the characterization of a novel perilipin in teleost fish
Source: eLife journal article supplement (doi:10.7554/elife.21771), 2017-02-28

A. Hsa9

B. Gac7

C. Gac9

D. Hsa9

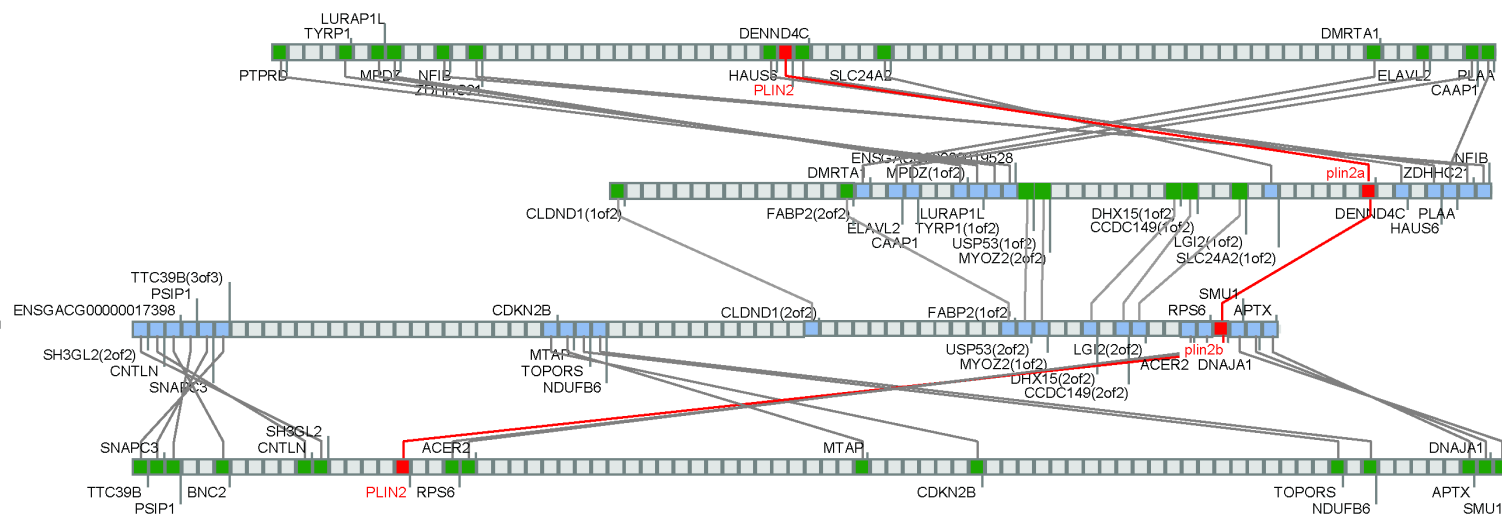

Supplement: supp [file elife-21771-supp-v1.zip]

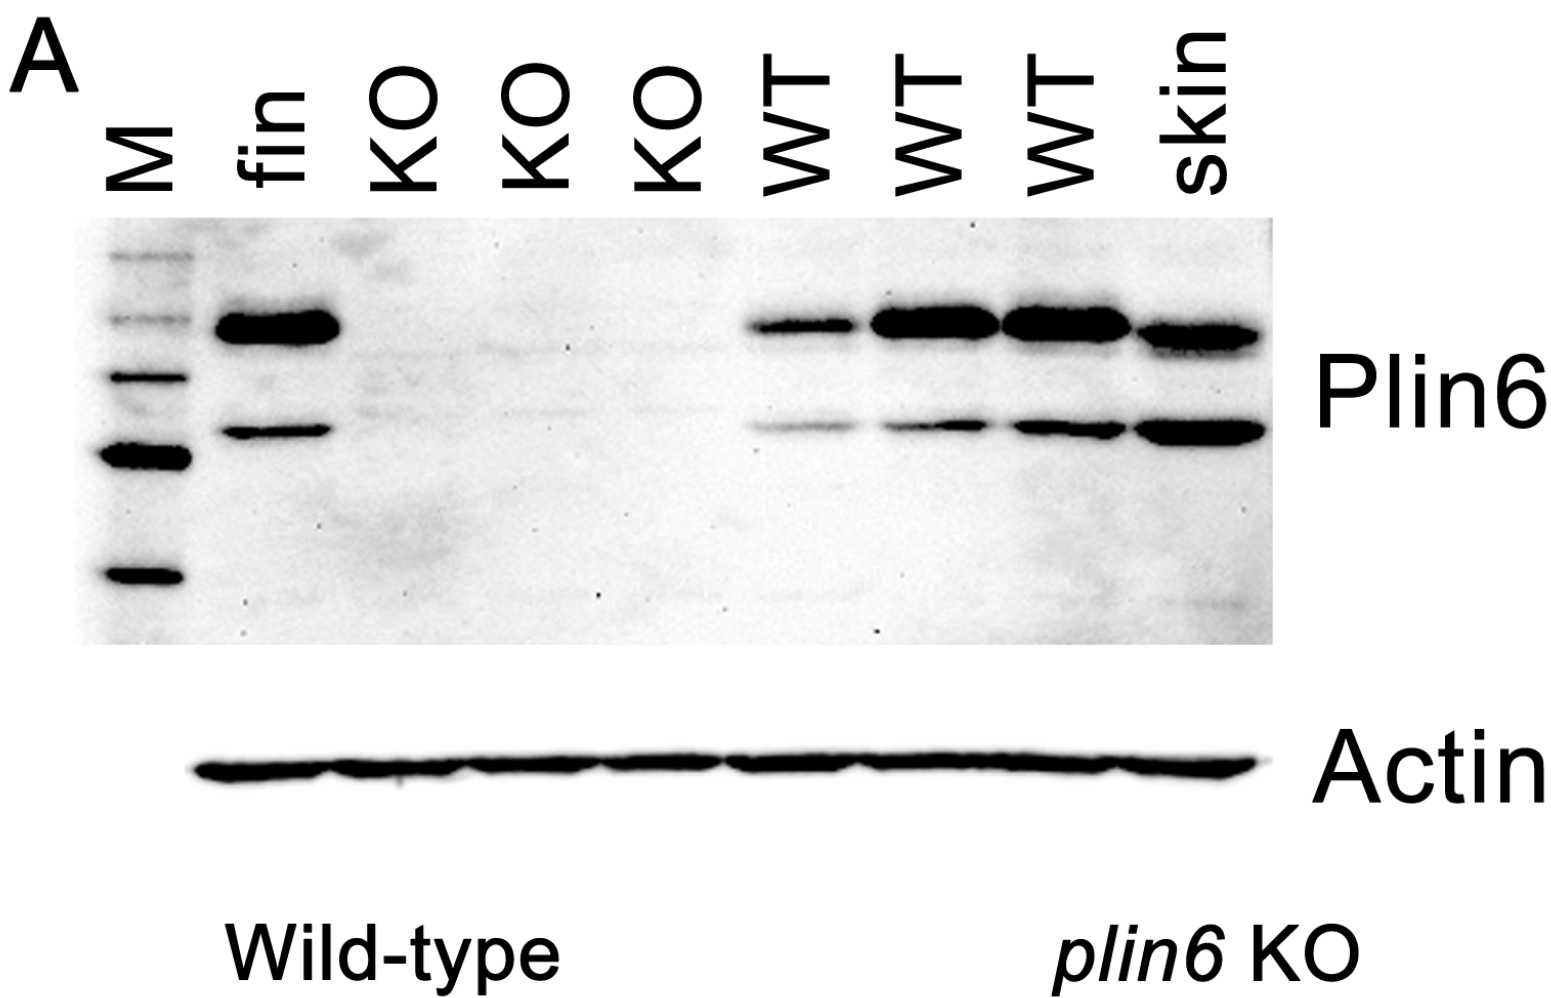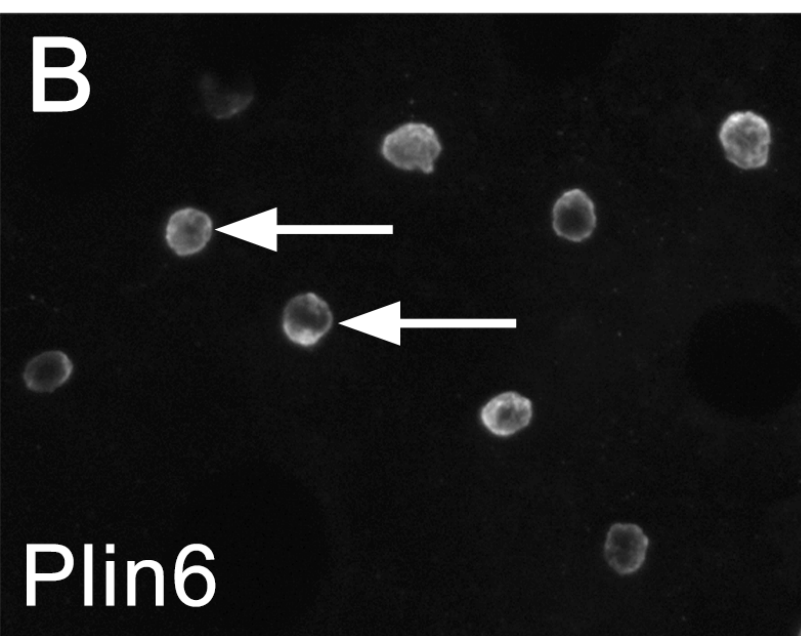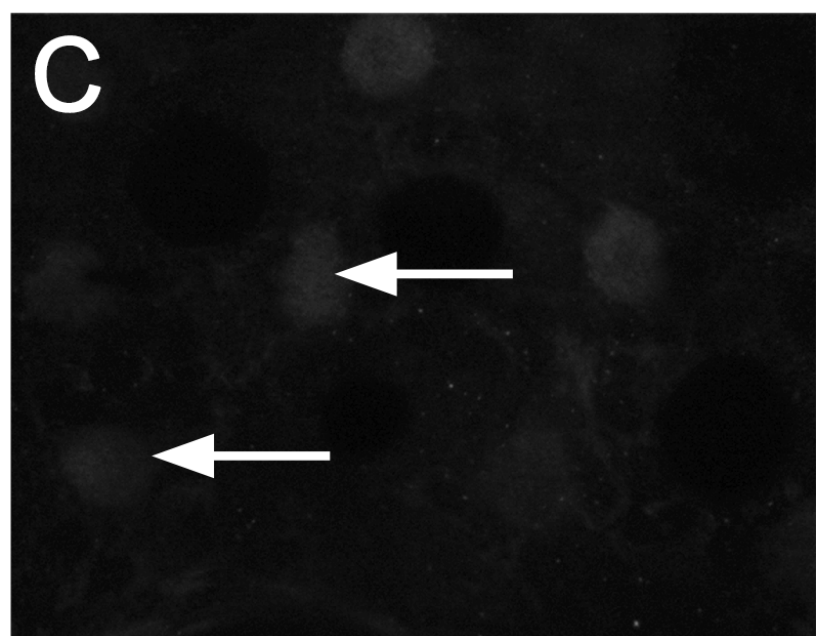

Supplement: supp [file elife-21771-supp-v1.zip]

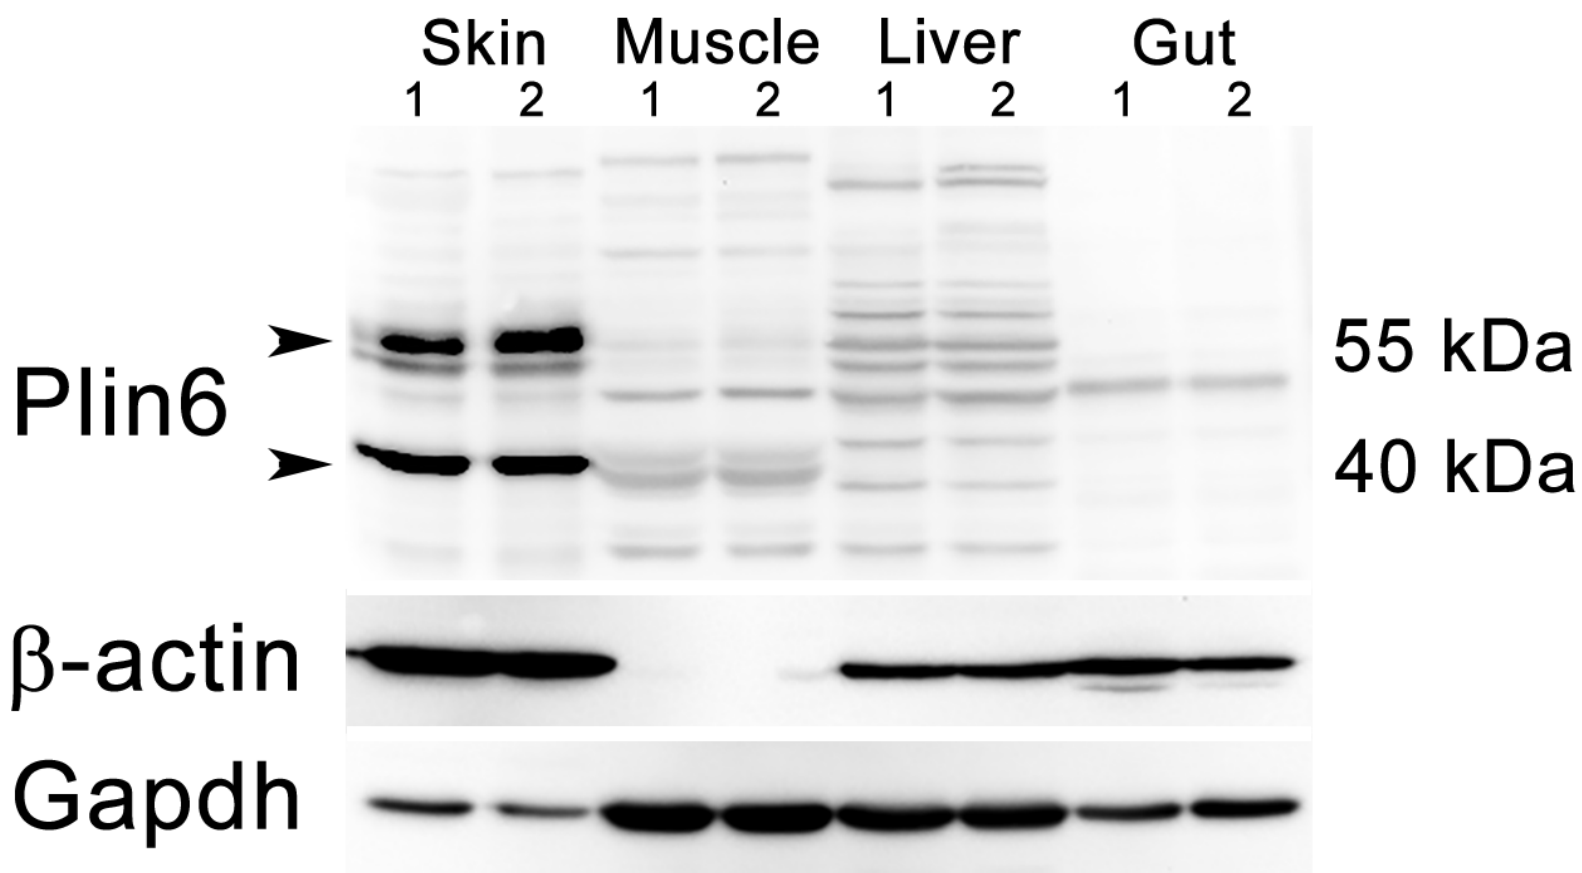

Supplement: supp [file elife-21771-supp-v1.zip]

wild-type

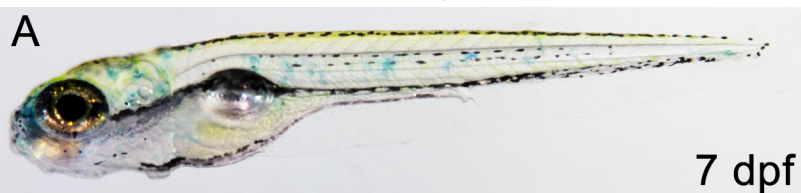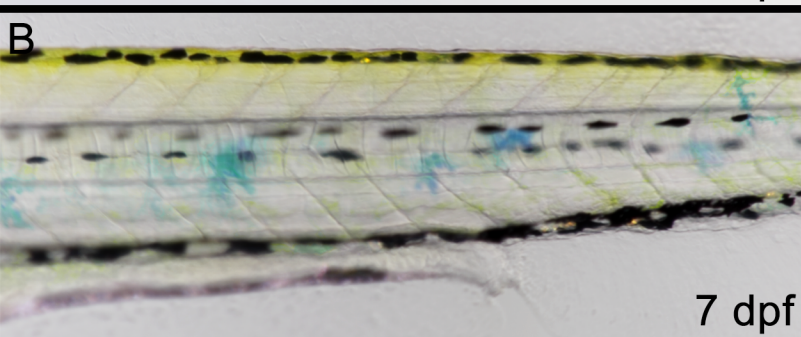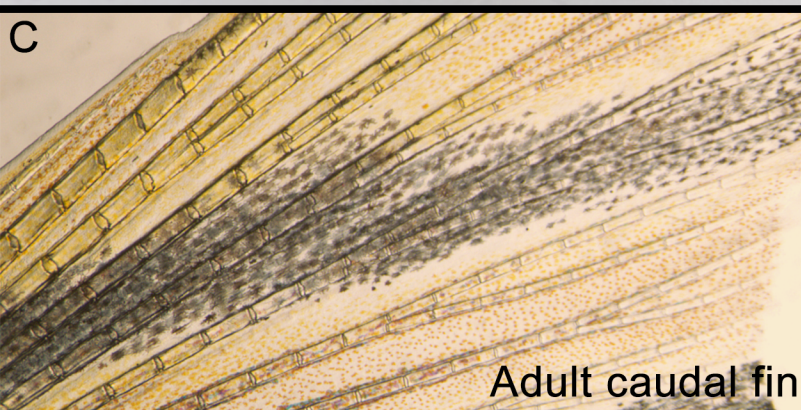

*plin6* mutant

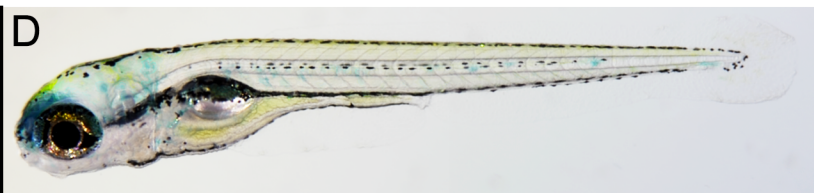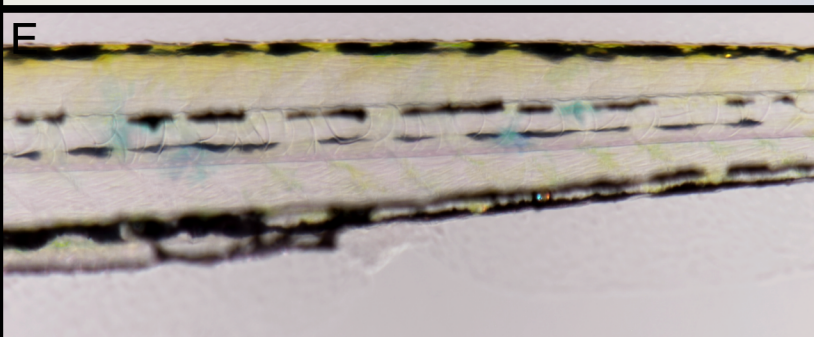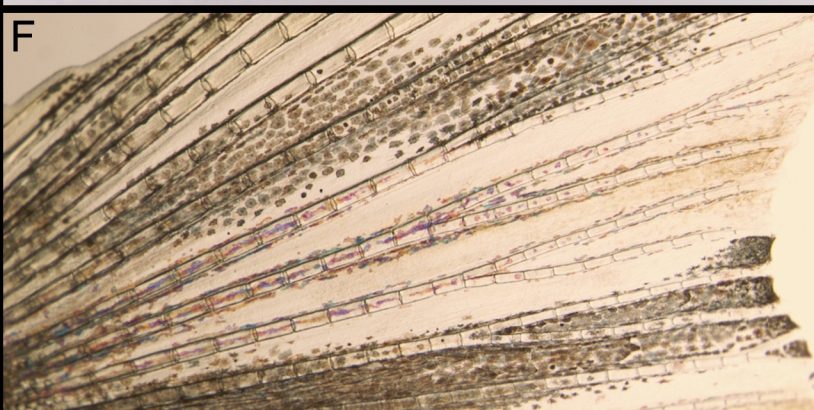

Supplement: supp [file elife-21771-supp-v1.zip]

# Zebrafish Xanthophore

Basal

Forskolin-IMBX

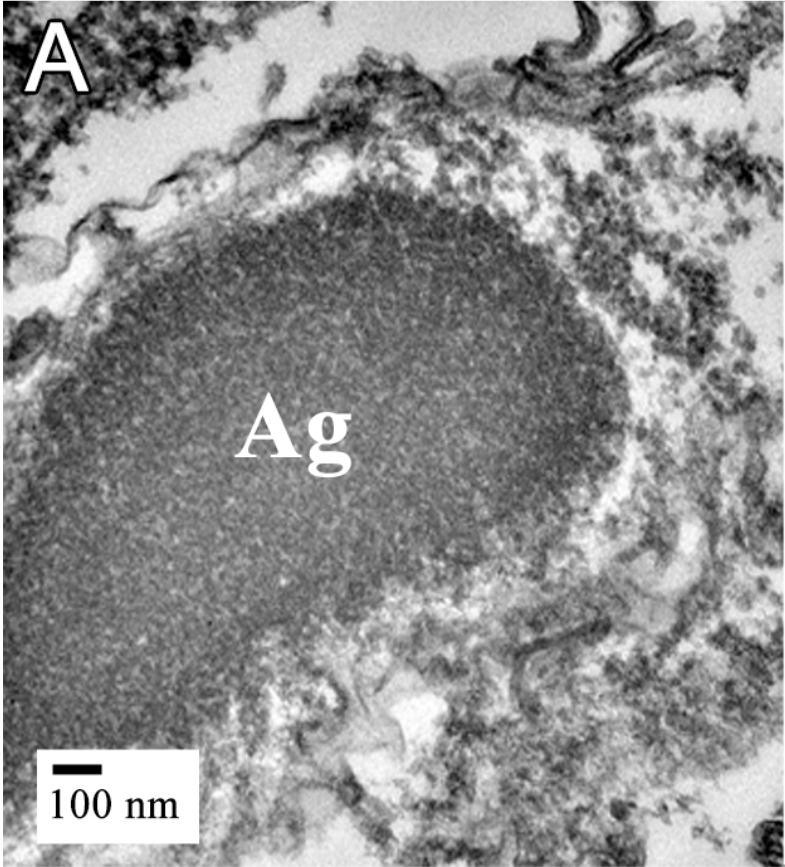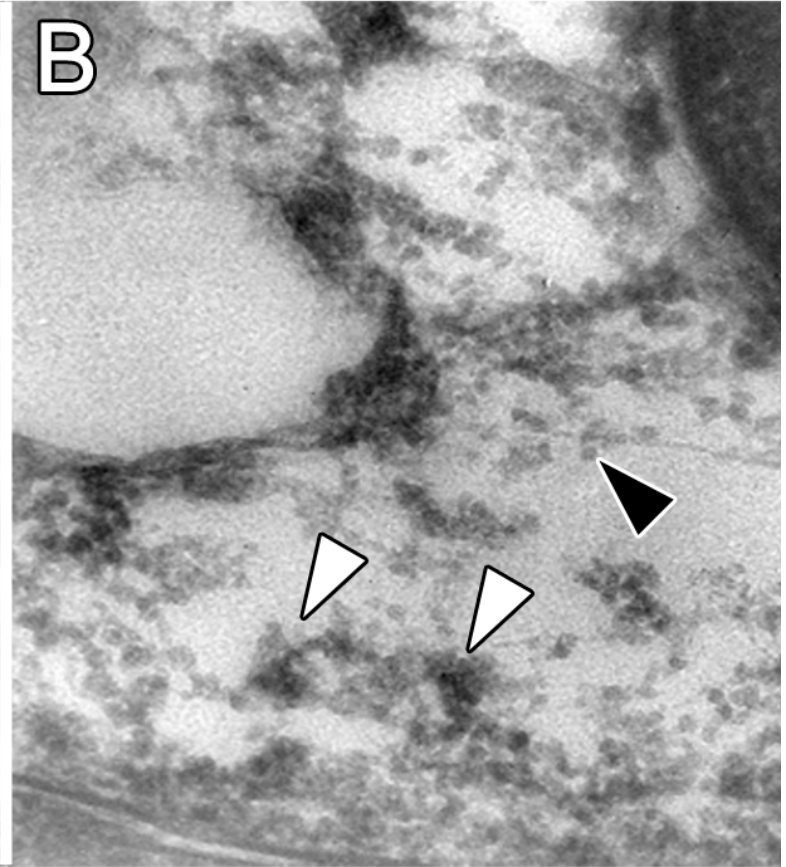

# Goldfish Xanthophore

Basal

Forskolin-IMBX

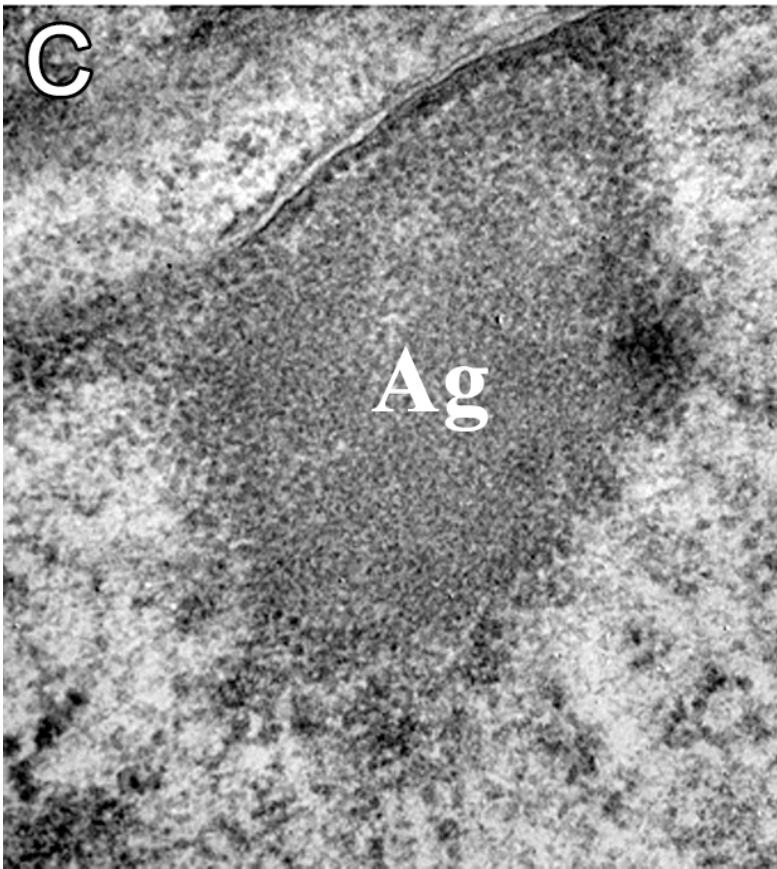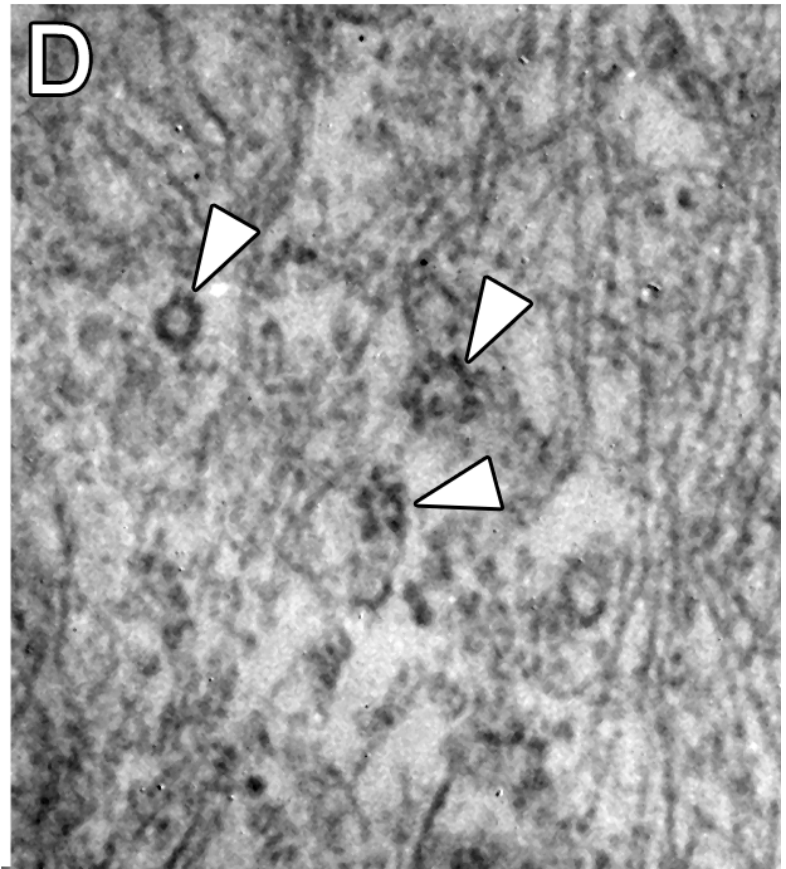

Supplement: supp [file elife-21771-supp-v1.zip]

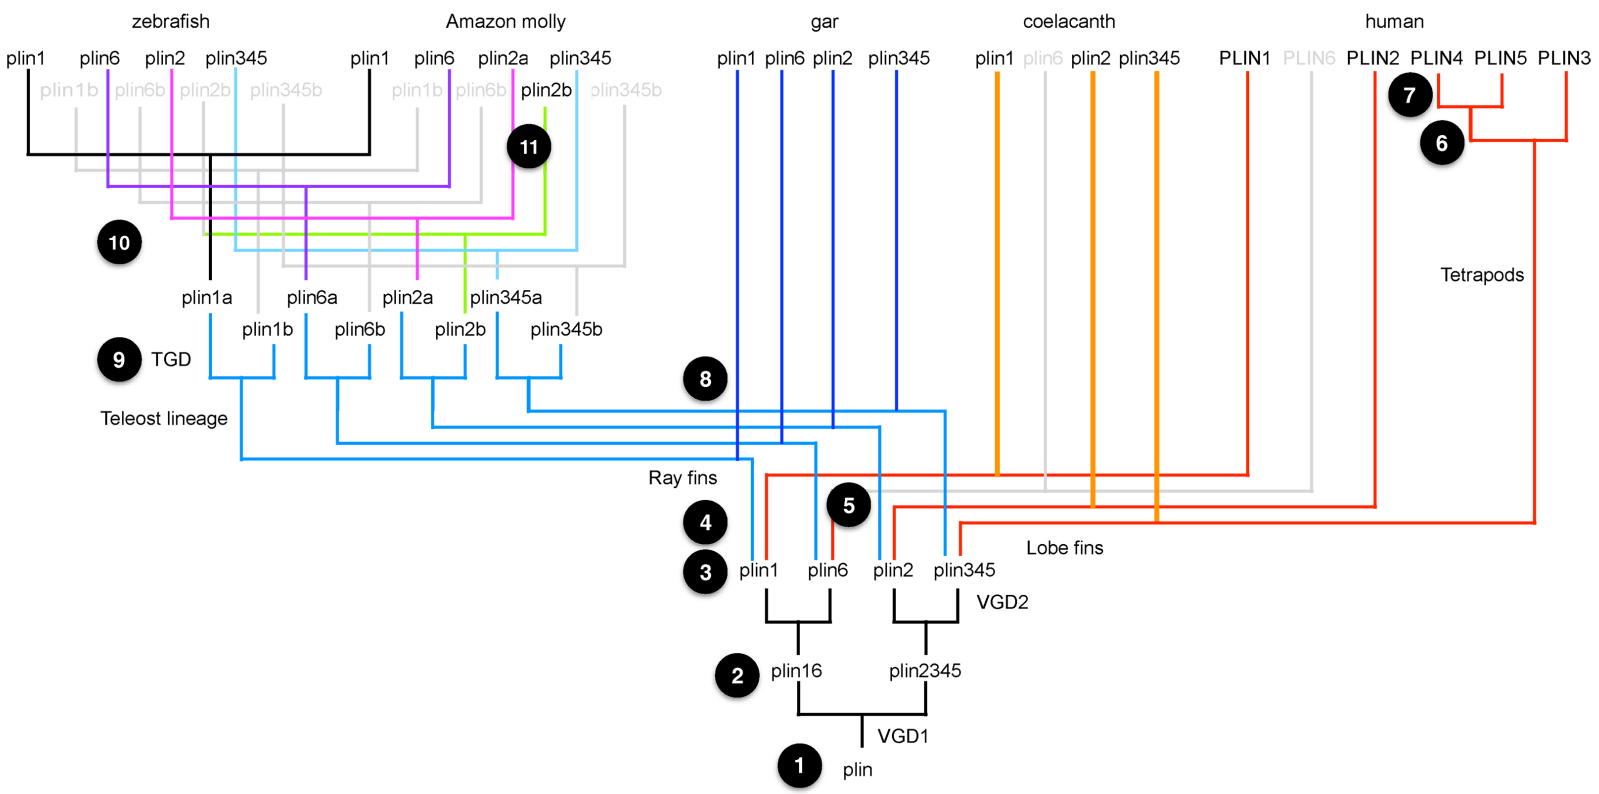

Supplement: supp [file elife-21771-supp-v1.zip]
